# Supplementary material for: Deletion of transketolase triggers a stringent metabolic response in promastigotes and loss of virulence in amastigotes of Leishmania mexicana
Source: PubMed Central journal article supplement (PMC5882173; doi:10.1371/journal.ppat.1006953), 2018-03-19

S2 Fig. Labelling pattern for octulose 8-phosphate, when 50% of glucose in the medium was U-<sup>13</sup>C-glucose.

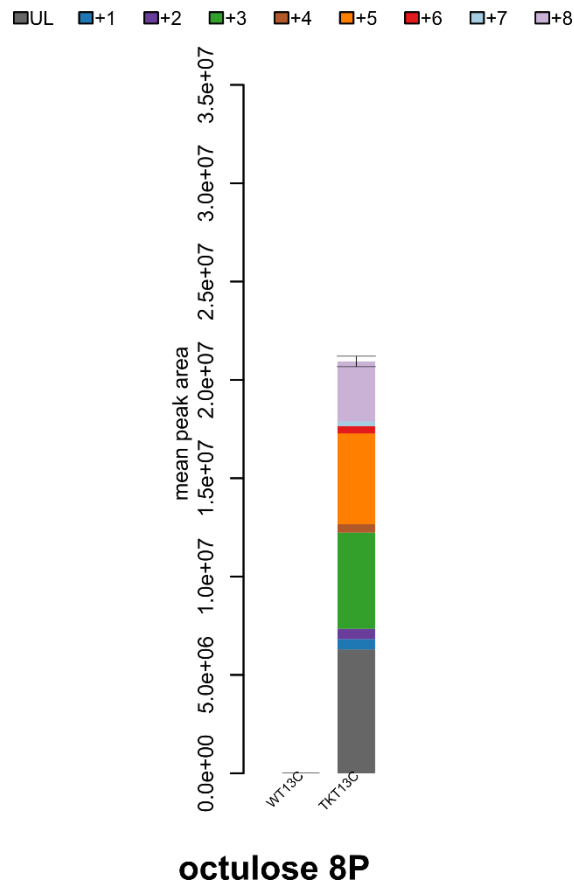

Supplement: ppat.1006953.s002.pdf [file ppat.1006953.s002.pdf]
