# Supplementary material for: Deletion of transketolase triggers a stringent metabolic response in promastigotes and loss of virulence in amastigotes of Leishmania mexicana
Source: PubMed Central journal article supplement (PMC5882173; doi:10.1371/journal.ppat.1006953), 2018-03-19

S3 Fig. Amino acids detected in spent medium metabolomics analysis. White – fresh medium, black – WT, grey –  $\Delta$ tkt.

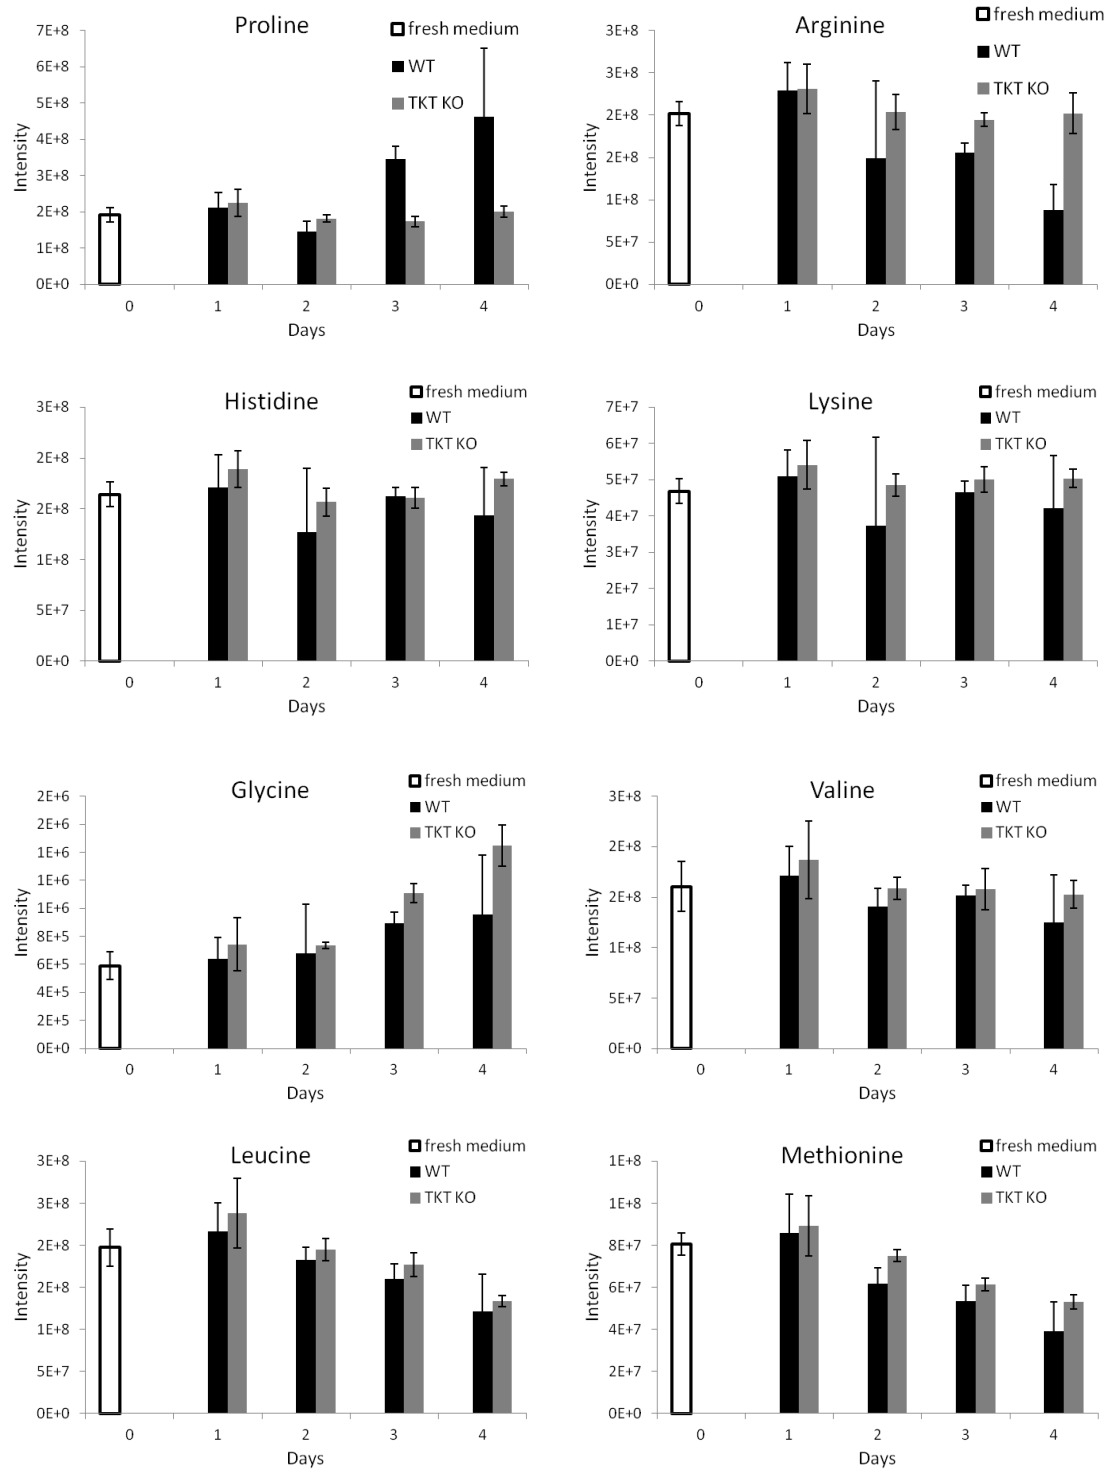

Supplement: ppat.1006953.s003.pdf [file ppat.1006953.s003.pdf]
