# Supplementary material for: Deletion of transketolase triggers a stringent metabolic response in promastigotes and loss of virulence in amastigotes of Leishmania mexicana
Source: PubMed Central journal article supplement (PMC5882173; doi:10.1371/journal.ppat.1006953), 2018-03-19

S4 Fig. Phenotypic characterisation of cells expressing solely cytosolic or solely glycosomal TKT. (A) Growth curves. (B) Alamar Blue Assay with glucose oxidase (GOX), fluorescence detected corresponds with viability of cells. Error bars indicate standard deviation, n = 3. (C) Western blot analysis of cells expressing GFP-TKT variants probed with  $\alpha$ -GFP antibody.

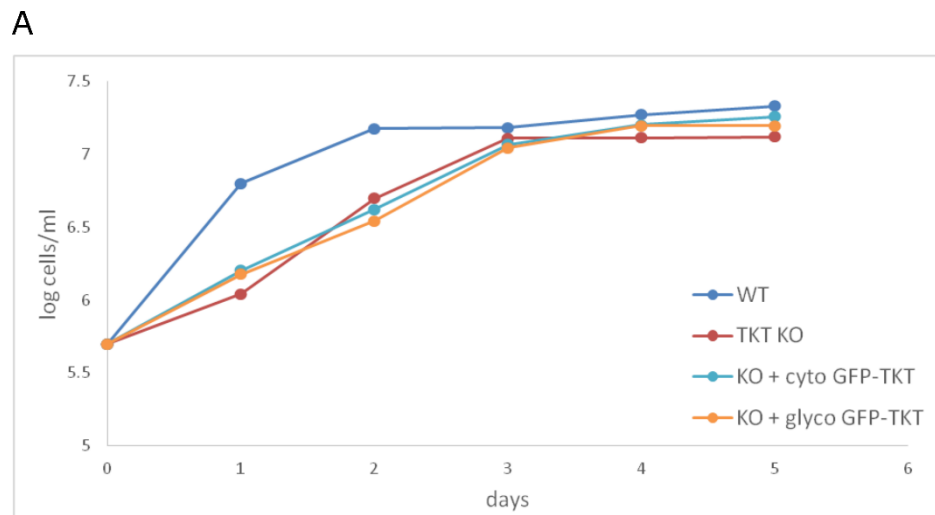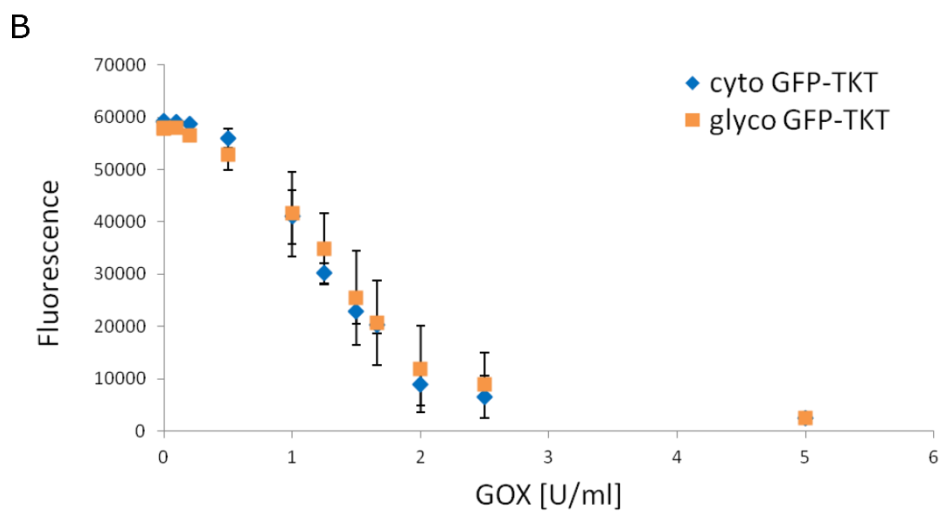

C

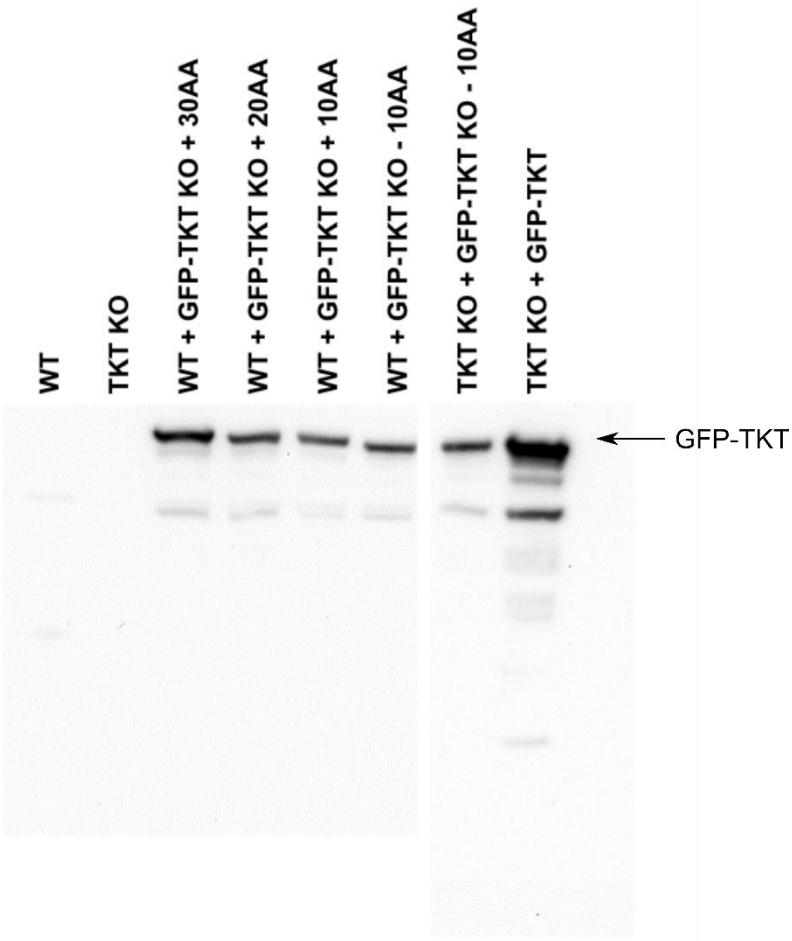

Supplement: ppat.1006953.s004.pdf [file ppat.1006953.s004.pdf]
