# Supplementary material for: Deletion of transketolase triggers a stringent metabolic response in promastigotes and loss of virulence in amastigotes of Leishmania mexicana
Source: PubMed Central journal article supplement (PMC5882173; doi:10.1371/journal.ppat.1006953), 2018-03-19

S5 Fig. LC-MS metabolomics comparison between  $\Delta$ tkt + cyto GFP-TKT and  $\Delta$ tkt + glyco GFP-TKT. (A) Selected metabolites of glycolysis and the PPP, the numbers represent relative abundance compared to WT. (B) Heat map of all the metabolites detected, yellow indicates no change, red increase and green decrease. The complete data are included in Tab S1.

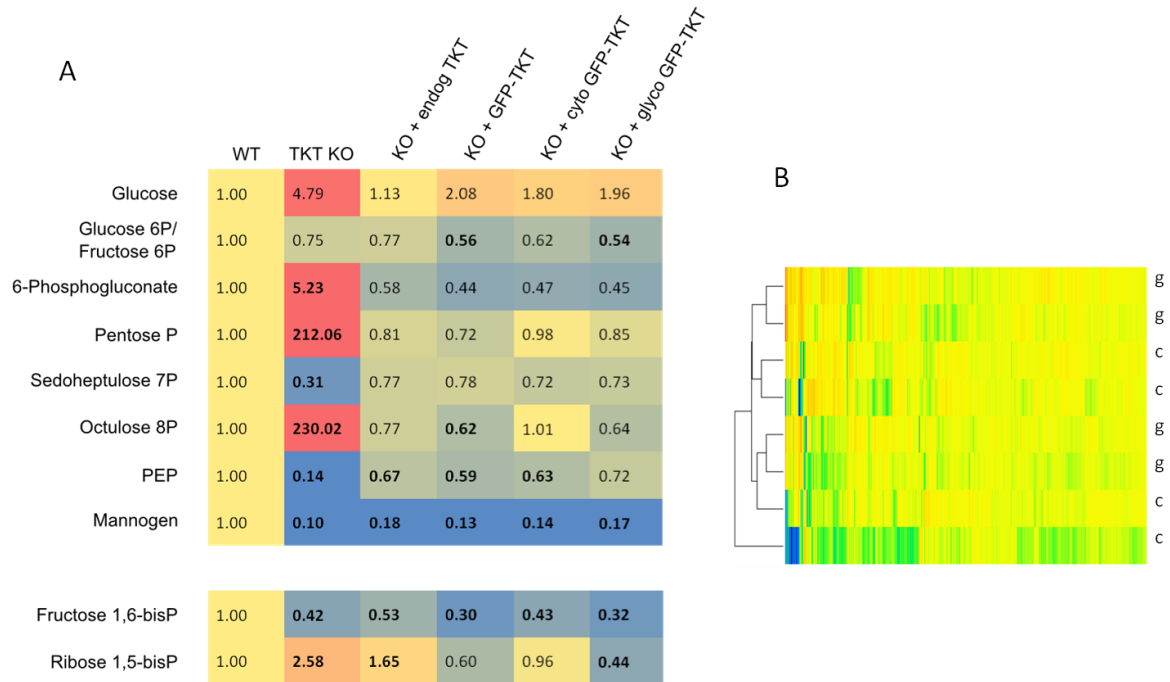

Supplement: ppat.1006953.s005.pdf [file ppat.1006953.s005.pdf]
